# Supplementary material for: Relevance of the GH-VEGFB/VEGFA axis in liver grafts from brain-dead donors with alcohol-associated liver disease
Source: Frontiers journal article supplement (doi:10.3389/fcell.2024.1455258), 2025-01-07
Supplement: Supplementary_file_2.pdf [file Supplementary_file_2.pdf]

---

*Supplementary table 2.* Transplant percentage of removed livers according to donor characteristics. Spain 2013-2022. (Extracted and translated from *ONT 2023*)

|                      | <b>Total livers removed</b> | <b>% transplant</b> | <b>p*</b> |
|----------------------|-----------------------------|---------------------|-----------|
| <b>Alcoholism</b>    |                             |                     | <0.001    |
| No                   | 10277                       | 74.7%               |           |
| Ex-drinker           | 278                         | 62.7%               |           |
| Moderate (<50g/day)  | 737                         | 65%                 |           |
| Important (>50g/day) | 409                         | 59.4%               |           |
